# Supplementary material for: DNA Detection of Schistosoma japonicum: Diagnostic Validity of a LAMP Assay for Low-Intensity Infection and Effects of Chemotherapy in Humans
Source: PubMed Central journal article supplement (PMC4395225; doi:10.1371/journal.pntd.0003668), 2015-04-13

General example

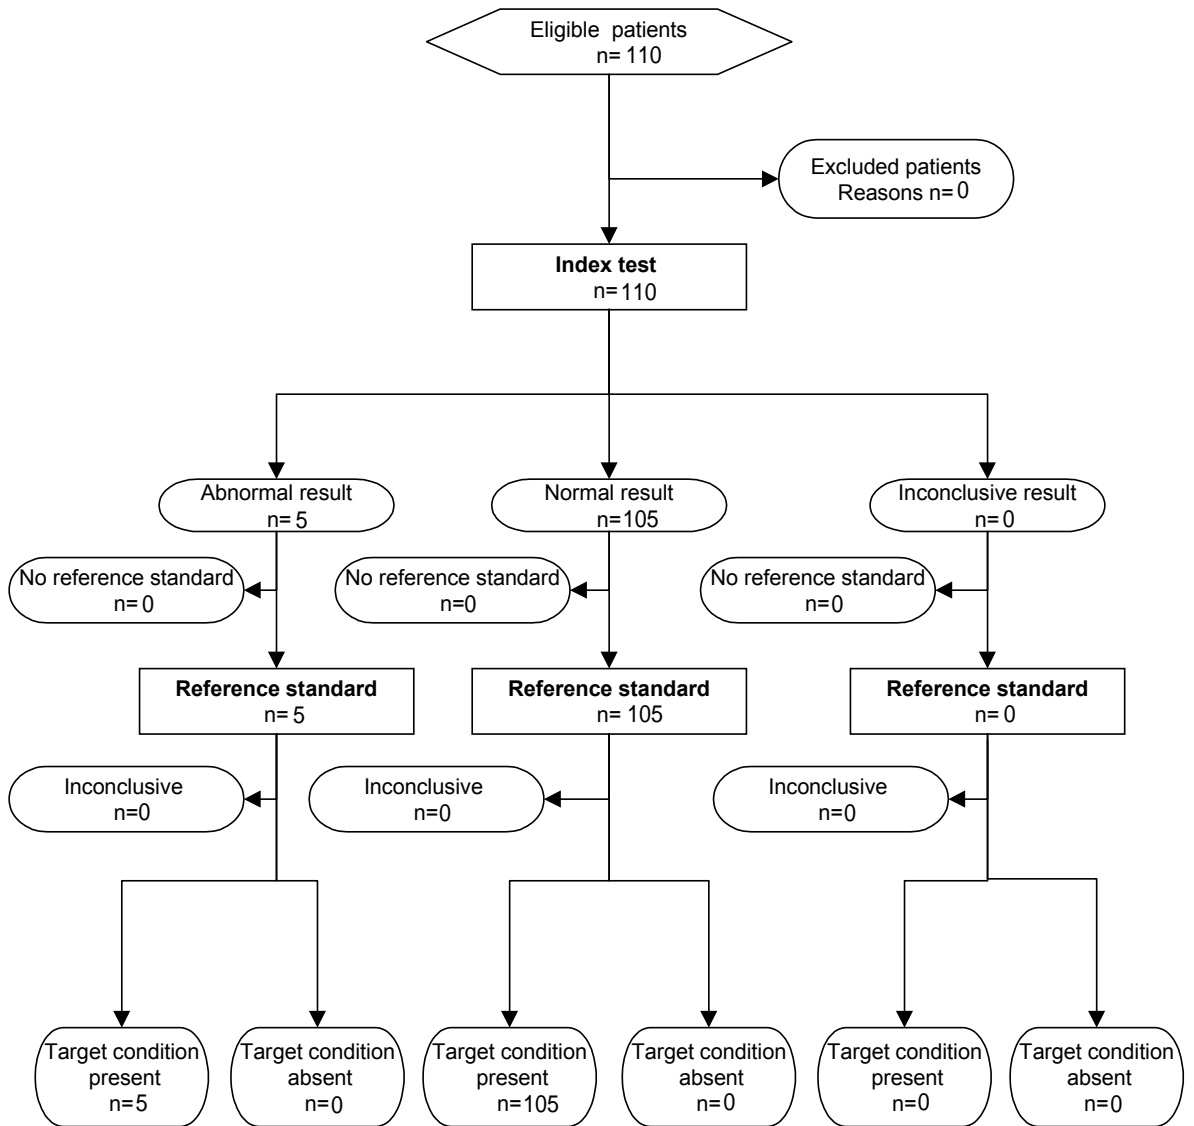

Supplement: pntd.0003668.s002.pdf [file pntd.0003668.s002.pdf]
